# Supplementary material for: From Matrices to Knowledge: Using Semantic Networks to Annotate the Connectome
Source: Front Neuroanat. 2018 Dec 7;12:111. doi: 10.3389/fnana.2018.00111 (PMC6292998; doi:10.3389/fnana.2018.00111)
Supplement: TABLE S2 — Functional brain network (FBN) of the limbic lobe. A query revealed 110 connections between brain areas that belong to the limbic lobe according to Allen Human Brain Atlas ontology classification which have associated DTI and resting state fMRI measurements from the NKI Rockland study. [file Table_2.XLS]

## Sheet: BioXM Report
Origin.Brain Structure	Origin.x	Origin.y	Origin.z	Target.Name	Target.x	Target.y	Target.z	DTI	fMRI
right cingulate posterior	1.0508	-14.1694	43.2542	left hippocampus	-22.4666	-6.9666	-21.7	0.00812136	0.0793529
right cingulate posterior	1.0508	-14.1694	43.2542	left cingulate posterior	-0.8717	-48.6324	25.641	0.170475	-0.132512
right cingulate posterior	1.0508	-14.1694	43.2542	right hippocampus	22.375	-6.0937	-21.5937	0.017036	0.0992714
right cingulate posterior	1.0508	-14.1694	43.2542	right cingulate anterior	0.4827	22.6551	35.1034	0.210629	0.117585
right cingulate posterior	1.0508	-14.1694	43.2542	left subcallosal	-1.1914	20.2127	-13.5744	0.0174473	0.0348674
right cingulate posterior	1.0508	-14.1694	43.2542	right cingulate anterior	0.7301	6.9206	39.0158	0.631735	0.586023
right cingulate posterior	1.0508	-14.1694	43.2542	left parahippocampal posterior	-23.7878	-34.2121	-12.7272	0.000989156	-0.00868836
right cingulate posterior	1.0508	-14.1694	43.2542	right parahippocampal posterior	26.9256	-31.752	-12.3966	0.00121196	0.0131748
right cingulate posterior	1.0508	-14.1694	43.2542	left cingulate anterior	-0.3265	32.0408	19.6734	0.140835	0.0657106
right cingulate posterior	1.0508	-14.1694	43.2542	right cingulate posterior	0.5555	-29.1666	32.7222	0.602979	0.160953
left hippocampus	-22.4666	-6.9666	-21.7	right cingulate posterior	1.0508	-14.1694	43.2542	0.00812136	0.0793529
left hippocampus	-22.4666	-6.9666	-21.7	left cingulate posterior	-0.8717	-48.6324	25.641	0.0273169	0.166707
left hippocampus	-22.4666	-6.9666	-21.7	right hippocampus	22.375	-6.0937	-21.5937	0.0331073	0.729835
left hippocampus	-22.4666	-6.9666	-21.7	right cingulate anterior	0.4827	22.6551	35.1034	0.00799405	-0.169059
left hippocampus	-22.4666	-6.9666	-21.7	left subcallosal	-1.1914	20.2127	-13.5744	0.0482263	0.272635
left hippocampus	-22.4666	-6.9666	-21.7	right cingulate anterior	0.7301	6.9206	39.0158	0.0104155	-0.0526493
left hippocampus	-22.4666	-6.9666	-21.7	left parahippocampal posterior	-23.7878	-34.2121	-12.7272	0.445079	0.428188
left hippocampus	-22.4666	-6.9666	-21.7	right parahippocampal posterior	26.9256	-31.752	-12.3966	0.0111892	0.3758
left hippocampus	-22.4666	-6.9666	-21.7	left cingulate anterior	-0.3265	32.0408	19.6734	0.00477929	-0.0421891
left hippocampus	-22.4666	-6.9666	-21.7	right cingulate posterior	0.5555	-29.1666	32.7222	0.0109493	0.0614412
left cingulate posterior	-0.8717	-48.6324	25.641	right cingulate posterior	1.0508	-14.1694	43.2542	0.170475	-0.132512
left cingulate posterior	-0.8717	-48.6324	25.641	left hippocampus	-22.4666	-6.9666	-21.7	0.0273169	0.166707
left cingulate posterior	-0.8717	-48.6324	25.641	right hippocampus	22.375	-6.0937	-21.5937	0.0259604	0.154729
left cingulate posterior	-0.8717	-48.6324	25.641	right cingulate anterior	0.4827	22.6551	35.1034	0.102811	-0.210855
left cingulate posterior	-0.8717	-48.6324	25.641	left subcallosal	-1.1914	20.2127	-13.5744	0.0108783	0.369883
left cingulate posterior	-0.8717	-48.6324	25.641	right cingulate anterior	0.7301	6.9206	39.0158	0.149703	-0.426716
left cingulate posterior	-0.8717	-48.6324	25.641	left parahippocampal posterior	-23.7878	-34.2121	-12.7272	0.165184	0.335118
left cingulate posterior	-0.8717	-48.6324	25.641	right parahippocampal posterior	26.9256	-31.752	-12.3966	0.15362	0.274393
left cingulate posterior	-0.8717	-48.6324	25.641	left cingulate anterior	-0.3265	32.0408	19.6734	0.0755015	0.116777
left cingulate posterior	-0.8717	-48.6324	25.641	right cingulate posterior	0.5555	-29.1666	32.7222	0.554789	0.560021
right hippocampus	22.375	-6.0937	-21.5937	right cingulate posterior	1.0508	-14.1694	43.2542	0.017036	0.0992714
right hippocampus	22.375	-6.0937	-21.5937	left hippocampus	-22.4666	-6.9666	-21.7	0.0331073	0.729835
right hippocampus	22.375	-6.0937	-21.5937	left cingulate posterior	-0.8717	-48.6324	25.641	0.0259604	0.154729
right hippocampus	22.375	-6.0937	-21.5937	right cingulate anterior	0.4827	22.6551	35.1034	0.00816543	-0.162118
right hippocampus	22.375	-6.0937	-21.5937	left subcallosal	-1.1914	20.2127	-13.5744	0.0175796	0.282521
right hippocampus	22.375	-6.0937	-21.5937	right cingulate anterior	0.7301	6.9206	39.0158	0.0154299	-0.0252177
right hippocampus	22.375	-6.0937	-21.5937	left parahippocampal posterior	-23.7878	-34.2121	-12.7272	0.0142203	0.405332
right hippocampus	22.375	-6.0937	-21.5937	right parahippocampal posterior	26.9256	-31.752	-12.3966	0.506206	0.45529
right hippocampus	22.375	-6.0937	-21.5937	left cingulate anterior	-0.3265	32.0408	19.6734	0.00515634	-0.0197281
right hippocampus	22.375	-6.0937	-21.5937	right cingulate posterior	0.5555	-29.1666	32.7222	0.0141298	0.0780366
right cingulate anterior	0.4827	22.6551	35.1034	right cingulate posterior	1.0508	-14.1694	43.2542	0.210629	0.117585
right cingulate anterior	0.4827	22.6551	35.1034	left hippocampus	-22.4666	-6.9666	-21.7	0.00799405	-0.169059
right cingulate anterior	0.4827	22.6551	35.1034	left cingulate posterior	-0.8717	-48.6324	25.641	0.102811	-0.210855
right cingulate anterior	0.4827	22.6551	35.1034	right hippocampus	22.375	-6.0937	-21.5937	0.00816543	-0.162118
right cingulate anterior	0.4827	22.6551	35.1034	left subcallosal	-1.1914	20.2127	-13.5744	0.0211395	-0.118003
right cingulate anterior	0.4827	22.6551	35.1034	right cingulate anterior	0.7301	6.9206	39.0158	0.605501	0.539974
right cingulate anterior	0.4827	22.6551	35.1034	left parahippocampal posterior	-23.7878	-34.2121	-12.7272	0.00115565	-0.211338
right cingulate anterior	0.4827	22.6551	35.1034	right parahippocampal posterior	26.9256	-31.752	-12.3966	0.000416229	-0.226354
right cingulate anterior	0.4827	22.6551	35.1034	left cingulate anterior	-0.3265	32.0408	19.6734	0.486804	0.611452
right cingulate anterior	0.4827	22.6551	35.1034	right cingulate posterior	0.5555	-29.1666	32.7222	0.181263	0.157554
left subcallosal	-1.1914	20.2127	-13.5744	right cingulate posterior	1.0508	-14.1694	43.2542	0.0174473	0.0348674
left subcallosal	-1.1914	20.2127	-13.5744	left hippocampus	-22.4666	-6.9666	-21.7	0.0482263	0.272635
left subcallosal	-1.1914	20.2127	-13.5744	left cingulate posterior	-0.8717	-48.6324	25.641	0.0108783	0.369883
left subcallosal	-1.1914	20.2127	-13.5744	right hippocampus	22.375	-6.0937	-21.5937	0.0175796	0.282521
left subcallosal	-1.1914	20.2127	-13.5744	right cingulate anterior	0.4827	22.6551	35.1034	0.0211395	-0.118003
left subcallosal	-1.1914	20.2127	-13.5744	right cingulate anterior	0.7301	6.9206	39.0158	0.0184512	-0.190803
left subcallosal	-1.1914	20.2127	-13.5744	left parahippocampal posterior	-23.7878	-34.2121	-12.7272	0.018532	0.238717
left subcallosal	-1.1914	20.2127	-13.5744	right parahippocampal posterior	26.9256	-31.752	-12.3966	0.00646624	0.202441
left subcallosal	-1.1914	20.2127	-13.5744	left cingulate anterior	-0.3265	32.0408	19.6734	0.0528146	0.159584
left subcallosal	-1.1914	20.2127	-13.5744	right cingulate posterior	0.5555	-29.1666	32.7222	0.0182749	0.198295
right cingulate anterior	0.7301	6.9206	39.0158	right cingulate posterior	1.0508	-14.1694	43.2542	0.631735	0.586023
right cingulate anterior	0.7301	6.9206	39.0158	left hippocampus	-22.4666	-6.9666	-21.7	0.0104155	-0.0526493
right cingulate anterior	0.7301	6.9206	39.0158	left cingulate posterior	-0.8717	-48.6324	25.641	0.149703	-0.426716
right cingulate anterior	0.7301	6.9206	39.0158	right hippocampus	22.375	-6.0937	-21.5937	0.0154299	-0.0252177
right cingulate anterior	0.7301	6.9206	39.0158	right cingulate anterior	0.4827	22.6551	35.1034	0.605501	0.539974
right cingulate anterior	0.7301	6.9206	39.0158	left subcallosal	-1.1914	20.2127	-13.5744	0.0184512	-0.190803
right cingulate anterior	0.7301	6.9206	39.0158	left parahippocampal posterior	-23.7878	-34.2121	-12.7272	0.000719831	-0.130016
right cingulate anterior	0.7301	6.9206	39.0158	right parahippocampal posterior	26.9256	-31.752	-12.3966	0.000494578	-0.095044
right cingulate anterior	0.7301	6.9206	39.0158	left cingulate anterior	-0.3265	32.0408	19.6734	0.184399	0.215509
right cingulate anterior	0.7301	6.9206	39.0158	right cingulate posterior	0.5555	-29.1666	32.7222	0.295388	-0.0519857
left parahippocampal posterior	-23.7878	-34.2121	-12.7272	right cingulate posterior	1.0508	-14.1694	43.2542	0.000989156	-0.00868836
left parahippocampal posterior	-23.7878	-34.2121	-12.7272	left hippocampus	-22.4666	-6.9666	-21.7	0.445079	0.428188
left parahippocampal posterior	-23.7878	-34.2121	-12.7272	left cingulate posterior	-0.8717	-48.6324	25.641	0.165184	0.335118
left parahippocampal posterior	-23.7878	-34.2121	-12.7272	right hippocampus	22.375	-6.0937	-21.5937	0.0142203	0.405332
left parahippocampal posterior	-23.7878	-34.2121	-12.7272	right cingulate anterior	0.4827	22.6551	35.1034	0.00115565	-0.211338
left parahippocampal posterior	-23.7878	-34.2121	-12.7272	left subcallosal	-1.1914	20.2127	-13.5744	0.018532	0.238717
left parahippocampal posterior	-23.7878	-34.2121	-12.7272	right cingulate anterior	0.7301	6.9206	39.0158	0.000719831	-0.130016
left parahippocampal posterior	-23.7878	-34.2121	-12.7272	right parahippocampal posterior	26.9256	-31.752	-12.3966	0.105438	0.773992
left parahippocampal posterior	-23.7878	-34.2121	-12.7272	left cingulate anterior	-0.3265	32.0408	19.6734	0.00181917	-0.0851665
left parahippocampal posterior	-23.7878	-34.2121	-12.7272	right cingulate posterior	0.5555	-29.1666	32.7222	0.0561346	0.150041
right parahippocampal posterior	26.9256	-31.752	-12.3966	right cingulate posterior	1.0508	-14.1694	43.2542	0.00121196	0.0131748
right parahippocampal posterior	26.9256	-31.752	-12.3966	left hippocampus	-22.4666	-6.9666	-21.7	0.0111892	0.3758
right parahippocampal posterior	26.9256	-31.752	-12.3966	left cingulate posterior	-0.8717	-48.6324	25.641	0.15362	0.274393
right parahippocampal posterior	26.9256	-31.752	-12.3966	right hippocampus	22.375	-6.0937	-21.5937	0.506206	0.45529
right parahippocampal posterior	26.9256	-31.752	-12.3966	right cingulate anterior	0.4827	22.6551	35.1034	0.000416229	-0.226354
right parahippocampal posterior	26.9256	-31.752	-12.3966	left subcallosal	-1.1914	20.2127	-13.5744	0.00646624	0.202441
right parahippocampal posterior	26.9256	-31.752	-12.3966	right cingulate anterior	0.7301	6.9206	39.0158	0.000494578	-0.095044
right parahippocampal posterior	26.9256	-31.752	-12.3966	left parahippocampal posterior	-23.7878	-34.2121	-12.7272	0.105438	0.773992
right parahippocampal posterior	26.9256	-31.752	-12.3966	left cingulate anterior	-0.3265	32.0408	19.6734	0.000678208	-0.107207
right parahippocampal posterior	26.9256	-31.752	-12.3966	right cingulate posterior	0.5555	-29.1666	32.7222	0.0662784	0.123173
left cingulate anterior	-0.3265	32.0408	19.6734	right cingulate posterior	1.0508	-14.1694	43.2542	0.140835	0.0657106
left cingulate anterior	-0.3265	32.0408	19.6734	left hippocampus	-22.4666	-6.9666	-21.7	0.00477929	-0.0421891
left cingulate anterior	-0.3265	32.0408	19.6734	left cingulate posterior	-0.8717	-48.6324	25.641	0.0755015	0.116777
left cingulate anterior	-0.3265	32.0408	19.6734	right hippocampus	22.375	-6.0937	-21.5937	0.00515634	-0.0197281
left cingulate anterior	-0.3265	32.0408	19.6734	right cingulate anterior	0.4827	22.6551	35.1034	0.486804	0.611452
left cingulate anterior	-0.3265	32.0408	19.6734	left subcallosal	-1.1914	20.2127	-13.5744	0.0528146	0.159584
left cingulate anterior	-0.3265	32.0408	19.6734	right cingulate anterior	0.7301	6.9206	39.0158	0.184399	0.215509
left cingulate anterior	-0.3265	32.0408	19.6734	left parahippocampal posterior	-23.7878	-34.2121	-12.7272	0.00181917	-0.0851665
left cingulate anterior	-0.3265	32.0408	19.6734	right parahippocampal posterior	26.9256	-31.752	-12.3966	0.000678208	-0.107207
left cingulate anterior	-0.3265	32.0408	19.6734	right cingulate posterior	0.5555	-29.1666	32.7222	0.127241	0.365254
right cingulate posterior	0.5555	-29.1666	32.7222	right cingulate posterior	1.0508	-14.1694	43.2542	0.602979	0.160953
right cingulate posterior	0.5555	-29.1666	32.7222	left hippocampus	-22.4666	-6.9666	-21.7	0.0109493	0.0614412
right cingulate posterior	0.5555	-29.1666	32.7222	left cingulate posterior	-0.8717	-48.6324	25.641	0.554789	0.560021
right cingulate posterior	0.5555	-29.1666	32.7222	right hippocampus	22.375	-6.0937	-21.5937	0.0141298	0.0780366
right cingulate posterior	0.5555	-29.1666	32.7222	right cingulate anterior	0.4827	22.6551	35.1034	0.181263	0.157554
right cingulate posterior	0.5555	-29.1666	32.7222	left subcallosal	-1.1914	20.2127	-13.5744	0.0182749	0.198295
right cingulate posterior	0.5555	-29.1666	32.7222	right cingulate anterior	0.7301	6.9206	39.0158	0.295388	-0.0519857
right cingulate posterior	0.5555	-29.1666	32.7222	left parahippocampal posterior	-23.7878	-34.2121	-12.7272	0.0561346	0.150041
right cingulate posterior	0.5555	-29.1666	32.7222	right parahippocampal posterior	26.9256	-31.752	-12.3966	0.0662784	0.123173
right cingulate posterior	0.5555	-29.1666	32.7222	left cingulate anterior	-0.3265	32.0408	19.6734	0.127241	0.365254
